# Supplementary material
Source: Elsevier journal article supplement (https://www.sciencedirect.com/science/article/pii/S0014256514002574)
Supplement: mmc1 [file S0014256514002574:mmc1.docx]

**Listado alfabético de participantes por unidades de lípidos y riesgo vascular de la Sociedad Española de Arteriosclerosis:**

Fátima Almagro Múgica (Hospital Donostia, San Sebastián)

José Luis Aranda Arcas (Hospital Universitario 12 de Octubre, Madrid)

Jorge Argimón Pallás (Hospital Sagrat Cor, Barcelona)

Pedro Armario García (Hospital General de L'Hospitalet, Hospitalet de Llobregat)

Teresa Arrobas Velilla (Hospital Virgen Macarena, Sevilla)

Aurelio Baixauli Rubio (Hospital de Manises, Manises)

Miguel Ángel Barba Romero (Complejo Hospitalario y Universitario de Albacete, Albacete)

Antonio Becerra Fernández (Hospital Universitario Ramón y Cajal, Madrid)

Ángel Brea Hernando (Hospital San Pedro, Logroño)

Julio A. Carbayo Herencia (Clínica Nuestra Sra. del Rosario, Albacete)

Fernando Civeira Murillo (Hospital Universitario Miguel Servet, Zaragoza)

Margarita Esteban Salán (Hospital de Cruces, Bilbao)

Jacinto Fernández Pardo (Hospital General Universitario Reina Sofía, Murcia)

Juan Carlos Ferrando Vela (Hospital Royo Villanova, Zaragoza)

Francisco Fuentes Jiménez (Hospital Universitario Reina Sofía, Córdoba)

Montserrat García Cors (Hospital General de Catalunya, Sant Cugat)

Juan de Dios García Díaz (Hospital Universitario Príncipe de Asturias, Alcalá de Henares)

Francisca García Iglesias (Hospital Carlos III, Madrid)

José Luis Hernández Hernández (Hospital Universitario Marqués de Valdecilla, Santander)

Luis Irigoyen Cucalon (Hospital Universitario Araba, Vitoria)

Sergio Jansen Chaparro (Hospital Carlos Haya, Málaga)

Sara Jordán (Hospital Universitari Bellvitge, Hospitalet de Llobregat)

Sergio Martínez Hervás (Hospital Clínico Universitario de Valencia, Valencia)

Esperanza Martorell Mateu (Hospital Comarcal d'Inca, Inca)

Marta Mauri Pont (Hospital de Terrassa, Terrassa)

Jesús Millán Núñez-Cortés (Hospital Universitario Gregorio Marañón, Madrid)

Clotilde Morales Coca (Hospital General de Manresa, Barcelona)

Ovidio Muñiz Grijalvo (Hospital Virgen del Rocío, Sevilla)

Josefa María Panisello (FUFOSA, Madrid)

Àngels Pedragosa Vall (Hospital del Mar, Barcelona)

Gonzalo F. Pía Iglesias (Hospital Arquitecto Marcide, Ferrol)

Nuria Plana Gil (Hospital Universitari San Joan, Reus)

Rafael Ramírez Montesinos (Hospital de Santa Tecla, Tarragona)

Leonardo Reinares García (Hospital Clínico, Madrid)

Celestino Rey-Joly Barrosso (Hospital Universitari Germans Trias i Pujol, Barcelona)

Antonio Ruiz García (Centro Salud Pinto, Madrid)

Julio Sánchez (Complejo Hospitalario de Navarra, Pamplona)

Pedro Sáenz Aranzubía (Hospital de Mérida, Mérida)

Manuel Suárez Tembra (Hospital San Rafael, A Coruña)

Pedro Valdivielso Felices (Hospital Virgen de la Victoria, Málaga)

Maite Villarroel Salcedo (Hospital San Jorge, Huesca)

Daniel Zambón Rados (Hospital Clinic, Barcelona)

Alberto Zamora Cervantes (Hospital de Blanes, Blanes, Girona)
